# Supplementary material for: Carbon stocks and changes of dead organic matter in China's forests
Source: PubMed Central journal article supplement (PMC5532249; doi:10.1038/s41467-017-00207-1), 2017-07-28
Supplement: 41467_2017_207_MOESM1_ESM.pdf [file 41467_2017_207_MOESM1_ESM.pdf]

File name: Supplementary Information

Description: Supplementary Figures, Supplementary Tables and Supplementary References

File name: Supplementary Data 1

Description: The dataset of dead organic matter in China's forests. It includes 422 the following information: locations, forest type, stand age, dominant tree species, and carbon density ( $\text{Mg C ha}^{-1}$  423 ) of aboveground biomass, soil and each dead organic matter component 424 for all sampling sites. The carbon density was an average of that of 3 plots for each site.

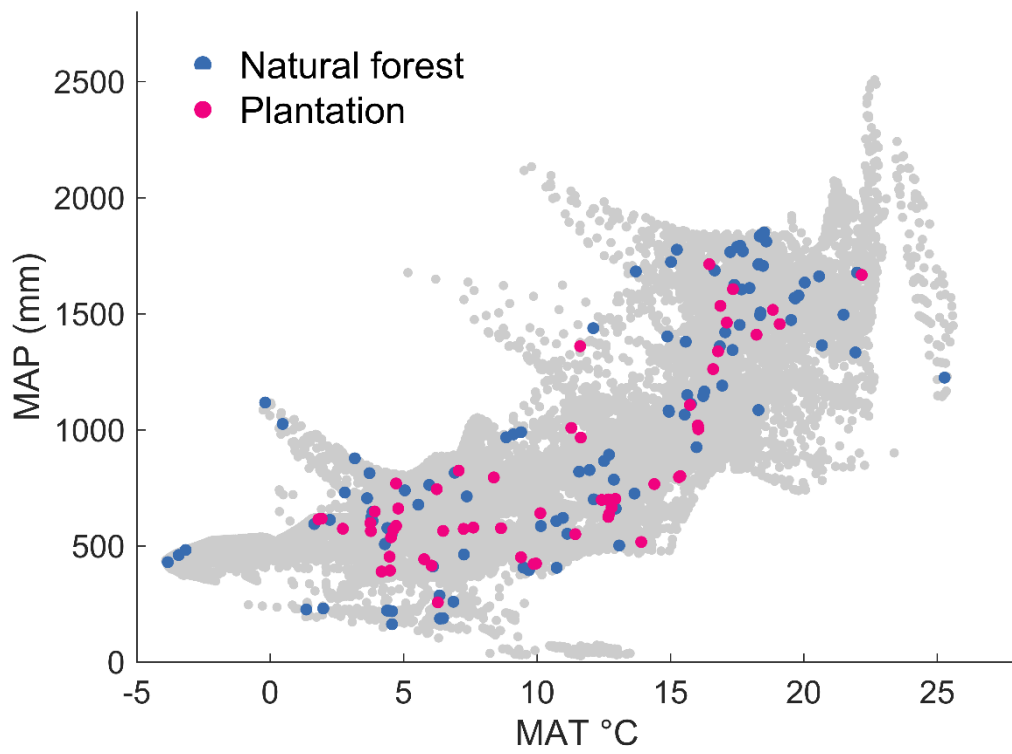

**Supplementary Figure 1 | Distribution of sampling sites in climatic space.** The gray areas represent the extent of forest distribution in China obtained from the digitalized 1:1,000,000 vegetation map<sup>1</sup>.

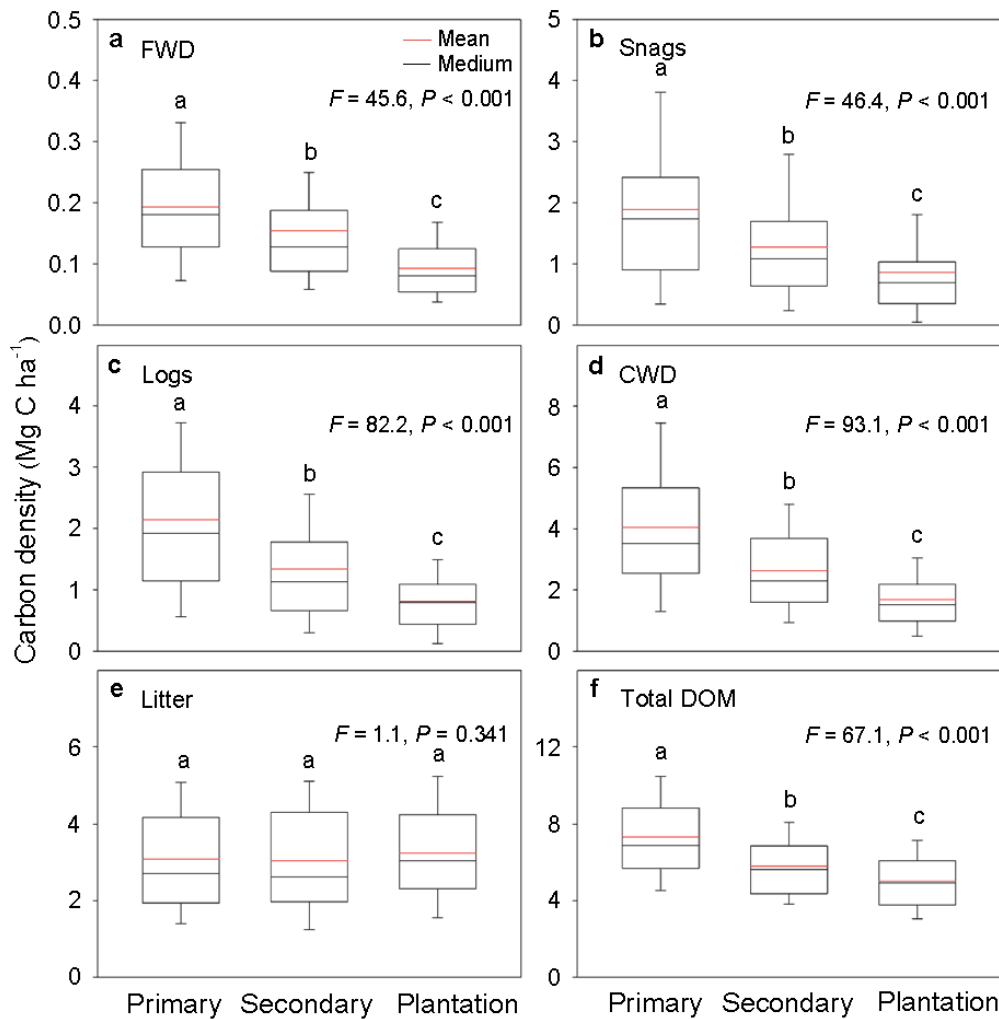

**Supplementary Figure 2 | Carbon densities of different dead organic matter components**

**in China's forests by forest origin.** Forest origin includes the primary, secondary, and

planted forests. (a) Fine woody debris (FWD), (b) snags, (c) logs, (d) coarse woody debris

(CWD), (e) litter, and (f) total dead organic matter (DOM). Boxes in box plots extend from

the first (25%) and third (75%) quartiles, with black line at the median and red line at the

mean value, and whiskers extend from the 5th to the 95th percentile (n = 195 for the primary

forests, n = 189 for the secondary forests, and n = 183 for the plantations). Different letters

denote significant differences at  $P < 0.05$ , via a one-way analysis of variance.

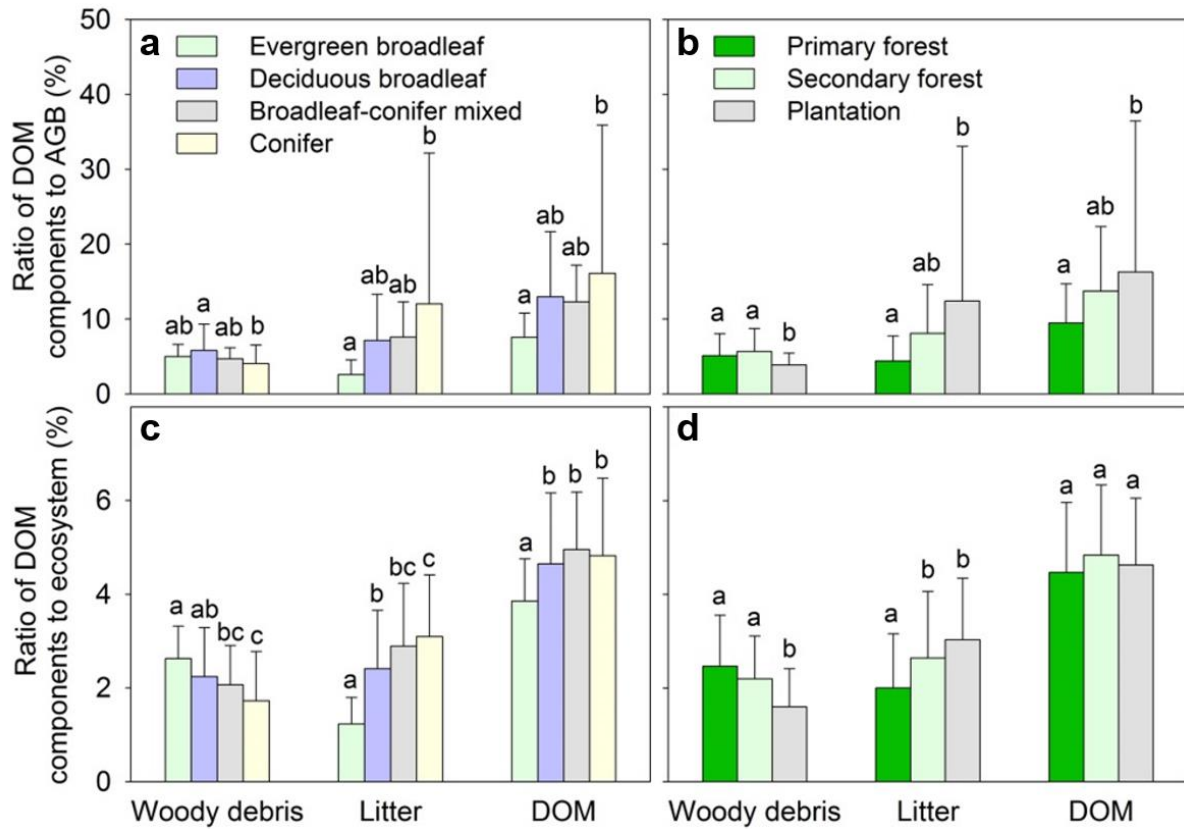

**Supplementary Figure 3 | Ratios of dead organic matter carbon to aboveground biomass and the total ecosystem carbon.** Ratios (%) of woody debris, litter and total dead organic matter (DOM) to **(a and b)** aboveground biomass (AGB) and **(c and d)** the total ecosystem carbon for **(a and c)** different forest types and **(b and d)** different forest origins. Data are presented as means  $\pm$  1 SD,  $n = 87, 186, 99$  and  $195$  for evergreen broadleaf, deciduous broadleaf, broadleaf-conifer mixed and coniferous forests, respectively, and  $n = 195, 189$  and  $183$  for the primary, secondary and planted forests, respectively. Different letters denote significant differences at  $P < 0.05$ , via a one-way analysis of variance.

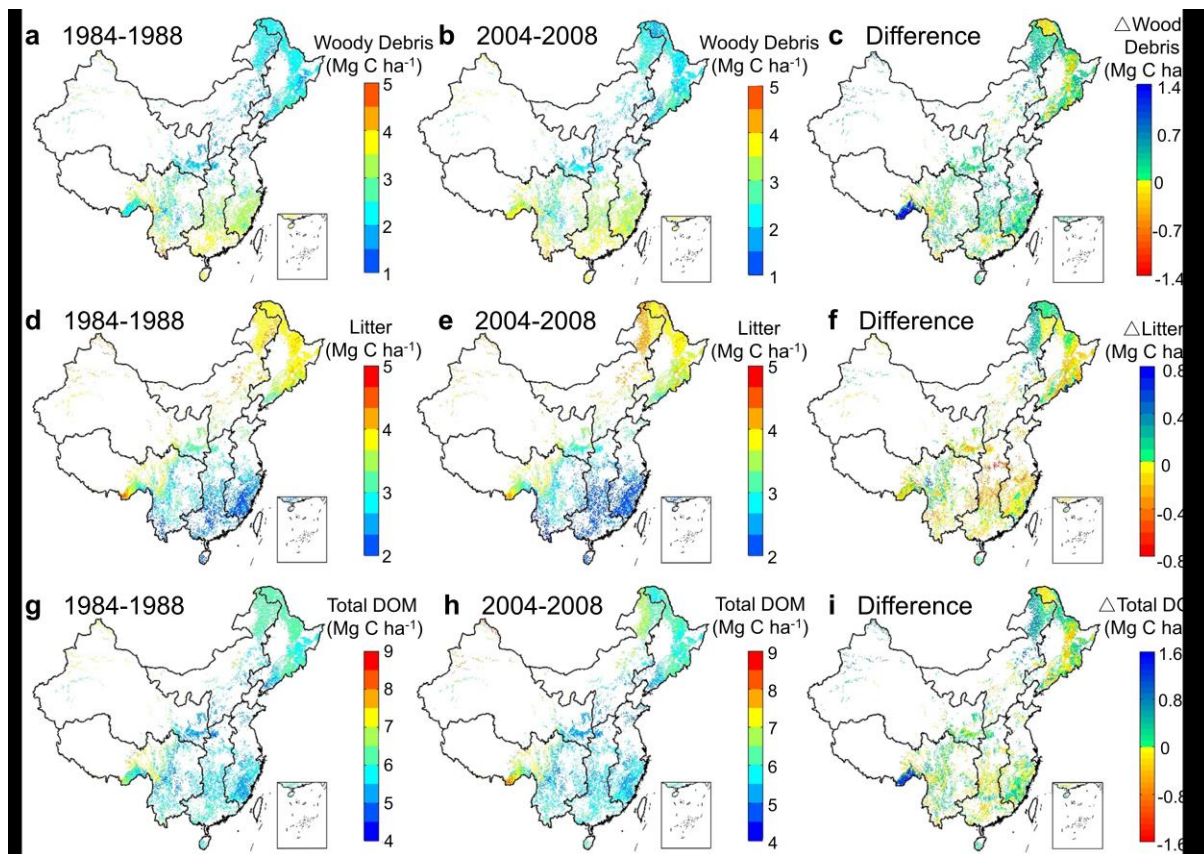

**Supplementary Figure 4 | Spatial distributions and differences in carbon density of dead organic matter.** Distributions in carbon densities ( $\text{Mg C ha}^{-1}$ ) of (a-c) woody debris, (d-f) litter and (g-i) the total dead organic matter (DOM) for the inventory periods of (a, d and g) 1984–1988 and (b, e and h) 2004–2008 and (c, f and i) their differences in China’s forests were estimated by 500 Random Forest models.

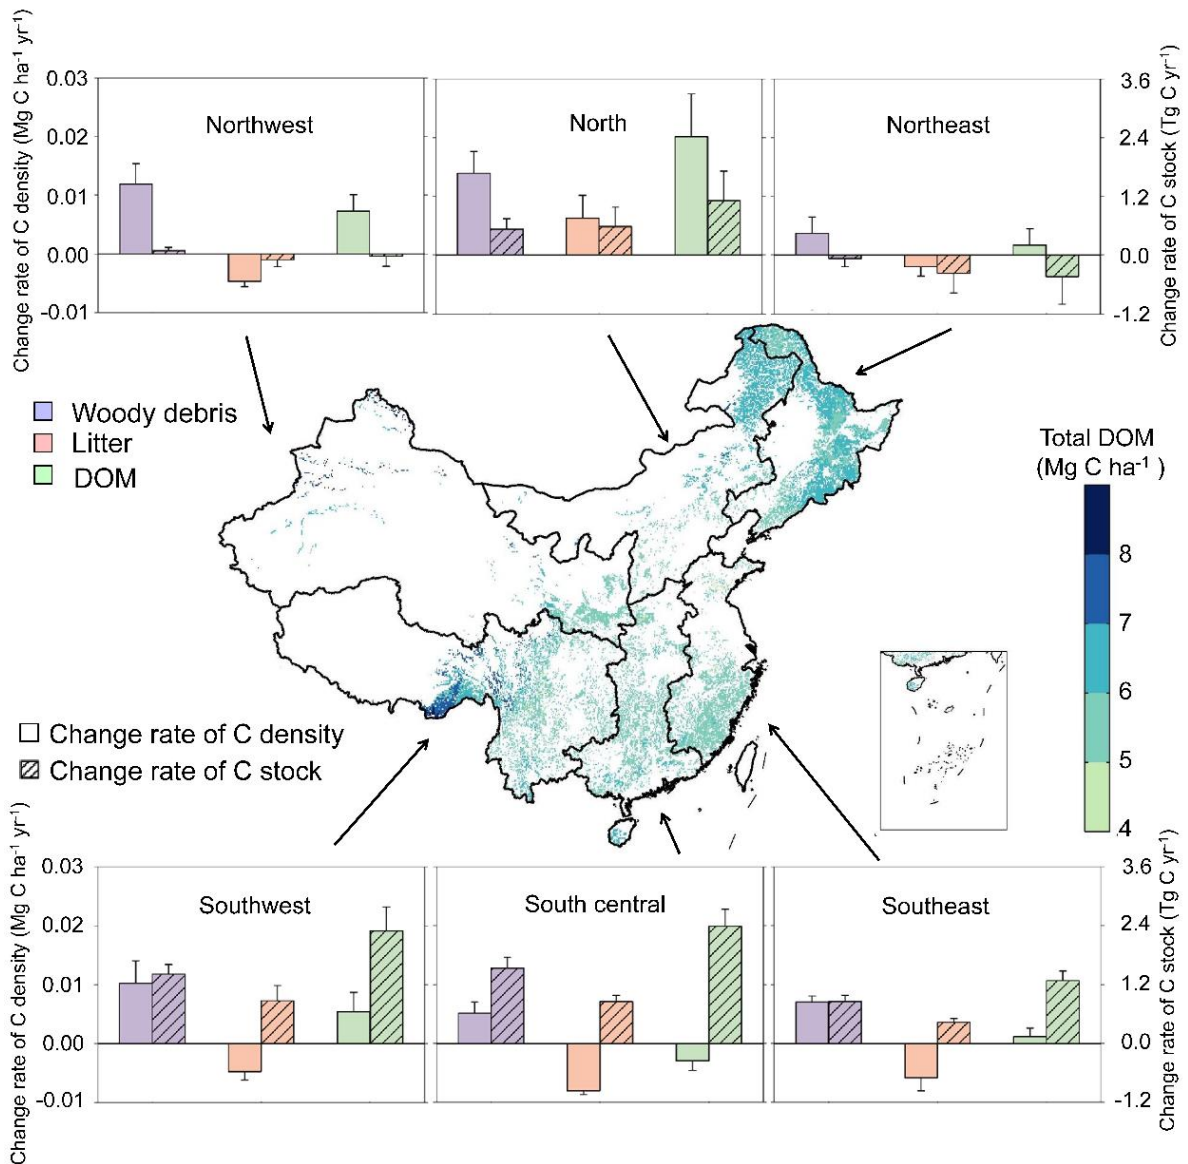

**Supplementary Figure 5 | Change rates of carbon density and stock of dead organic matter.** Change rates of carbon density (Mg C ha<sup>-1</sup> yr<sup>-1</sup>) and stock (Tg C yr<sup>-1</sup>) of woody debris, litter, and total dead organic matter (DOM) in different regions of China from 1984–2008 are presented as means  $\pm$  1 SD, generated by 500 resamplings.

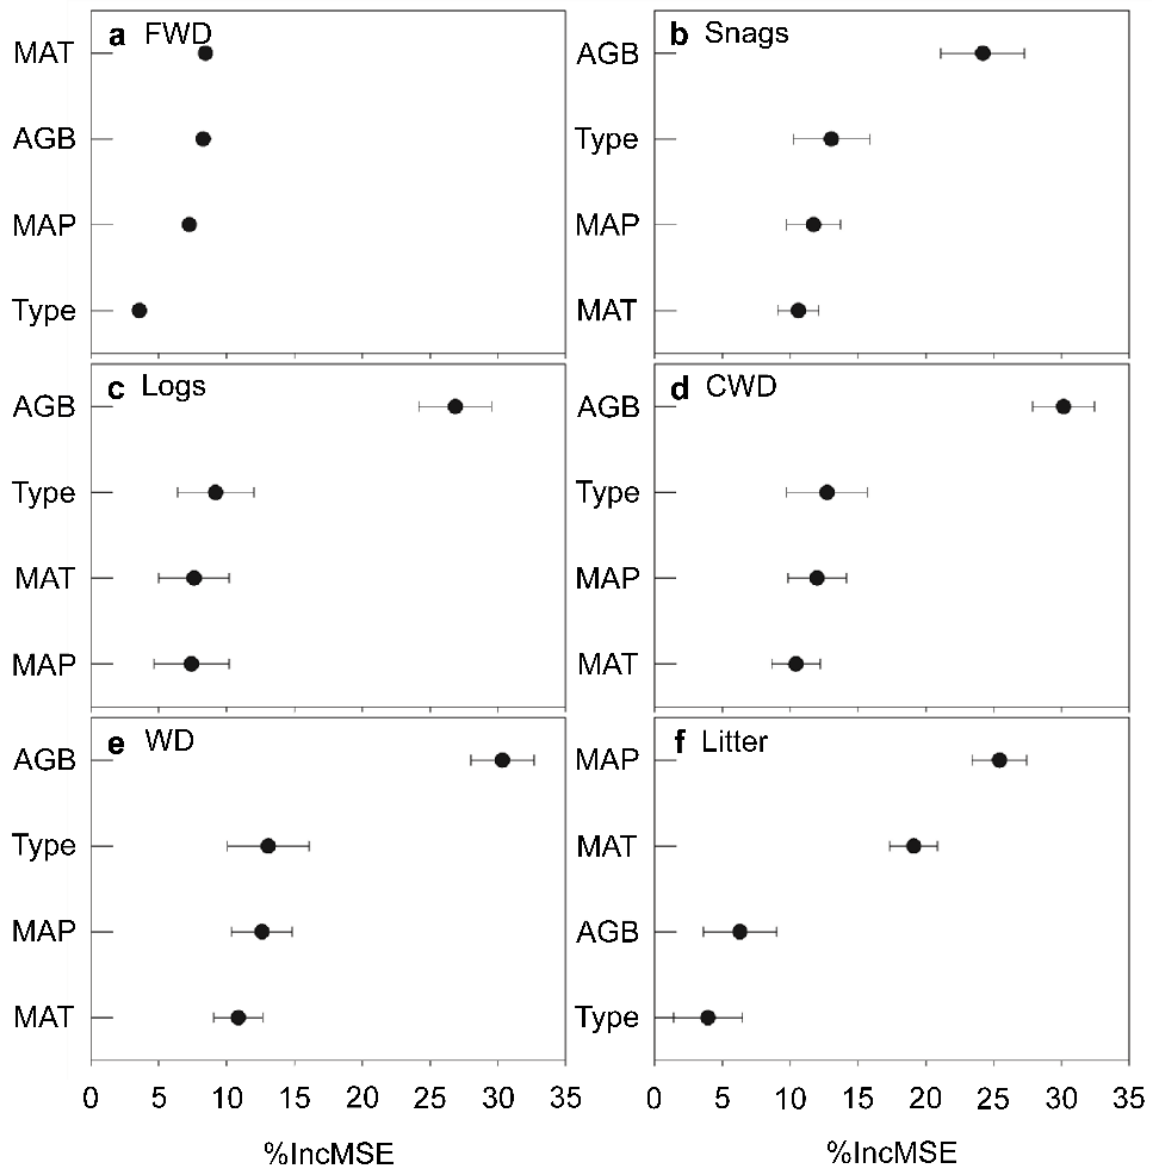

**Supplementary Figure 6 | Importance of the variables in the Random Forest models built from a training dataset denoted by percentage increase of mean squared error.**

Values of the percentage increase of mean squared error (%IncMSE) are means  $\pm$  1 SD generated from 500 resamplings of the carbon density of (a) fine woody debris (FWD), (b) snags, (c) logs, (d) coarse woody debris (CWD), (e) woody debris (WD) and (f) litter. AGB, Type, MAT and MAP represent aboveground biomass carbon density, forest type, mean annual temperature and precipitation, respectively.

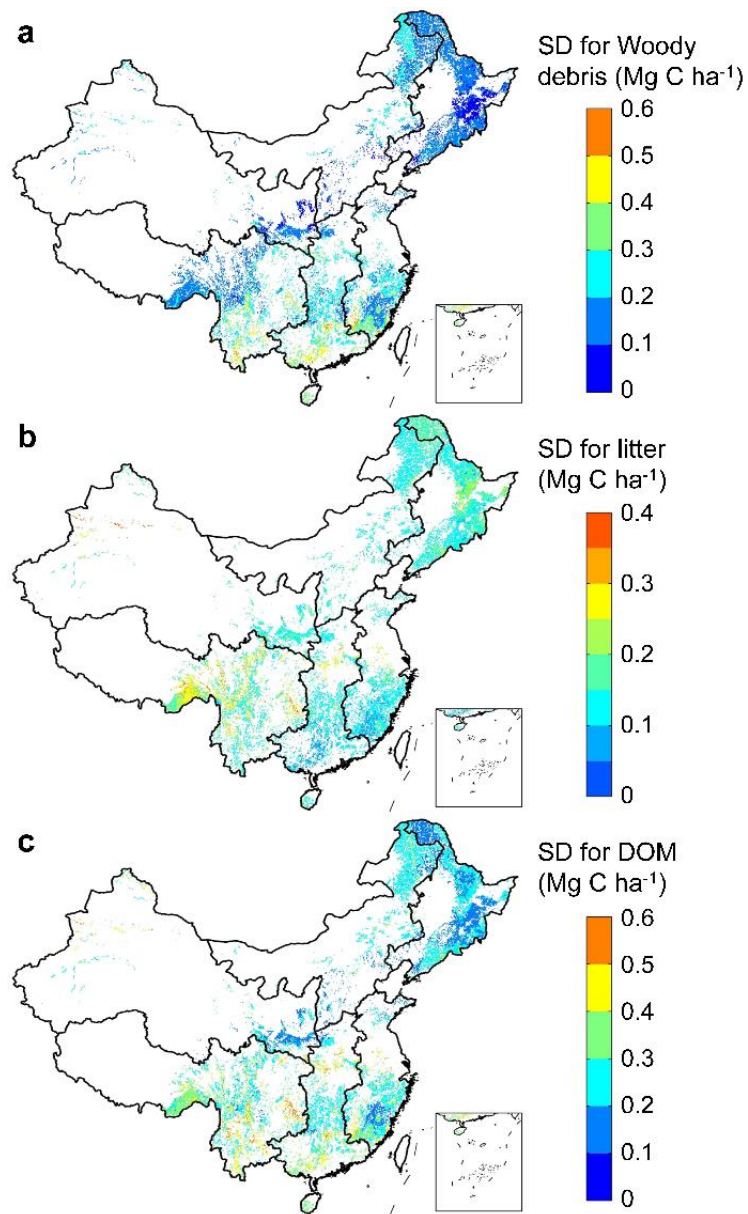

**Supplementary Figure 7 | Spatial distributions of standard deviation for dead organic matter.** The standard deviation (SD) of the grid-cell carbon density of (a) woody debris, (b) litter and (c) total dead organic matter (DOM) in China's forests were generated by 500 Random Forest models.



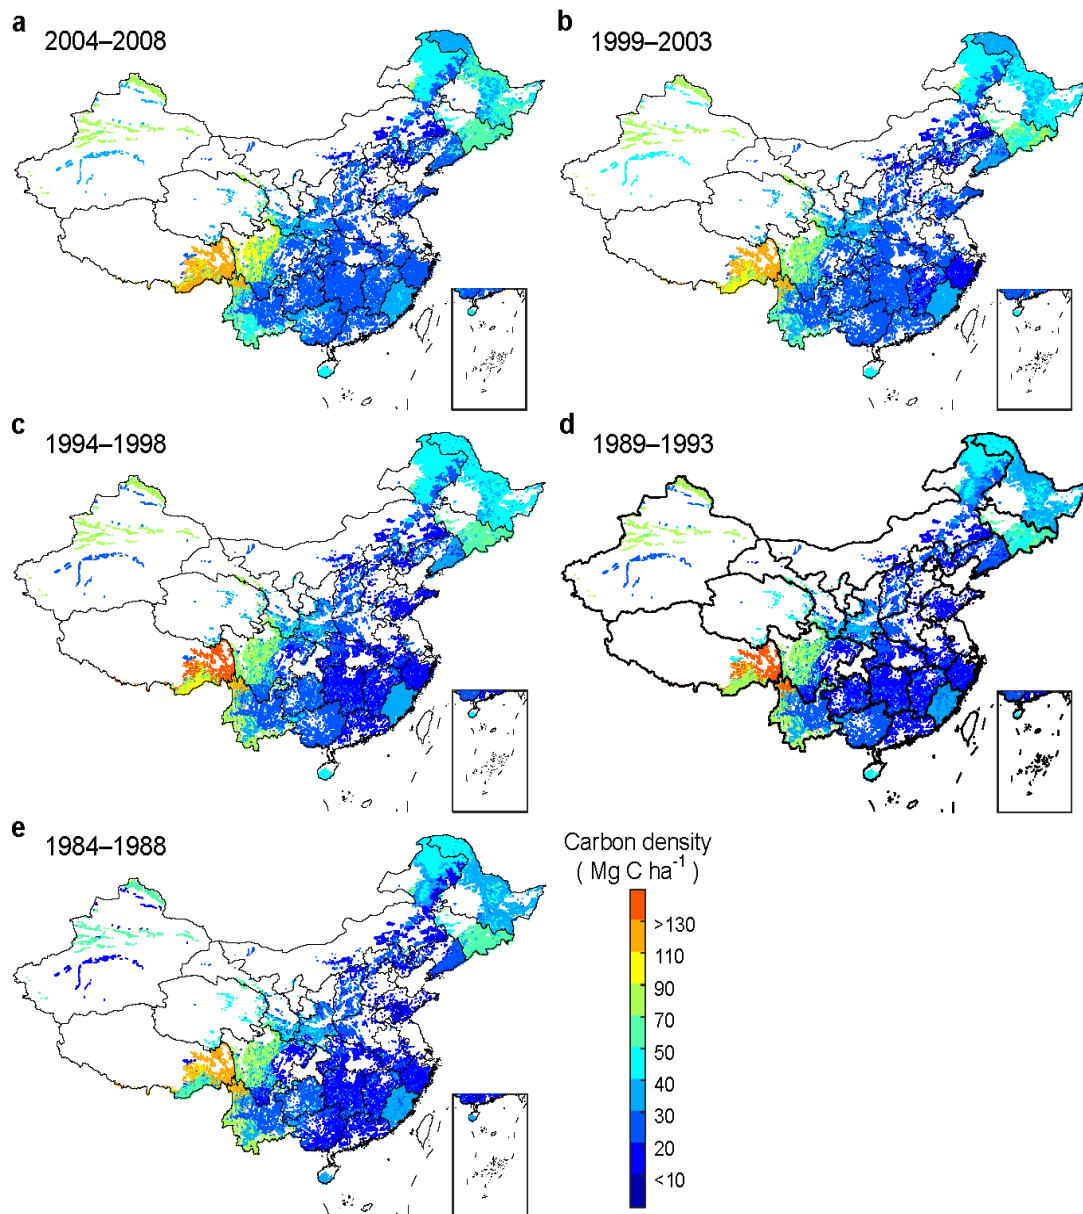

**Supplementary Figure 8 | Spatial distribution of carbon density of aboveground biomass in China's forests in different inventory periods. (a) 2004–2008, (b) 1999–2003, (c) 1994–1998, (d) 1989–1993, and (e) 1984–1988.**

**Supplementary Table 1** | Modeled carbon density ( $\text{Mg C ha}^{-1}$ ) and stock ( $\text{Tg C}$ ) for dead organic matter in China's forests for five inventory periods of 1984–1988, 1989–1993, 1994–1998, 1999–2003, and 2004–2008.

| C sector                          | 1984–1988        | 1989–1993        | 1994–1998        | 1999–2003        | 2004–2008        |
|-----------------------------------|------------------|------------------|------------------|------------------|------------------|
| Forest area (Mha)                 | 131.7            | 139.7            | 132.4            | 142.8            | 155.6            |
| Density ( $\text{Mg C ha}^{-1}$ ) |                  |                  |                  |                  |                  |
| Woody debris                      | 2.61±0.18        | 2.62±0.18        | 2.72±0.18        | 2.74±0.19        | 2.76±0.19        |
| FWD                               | 0.14±0.01        | 0.14±0.01        | 0.14±0.01        | 0.14±0.01        | 0.14±0.01        |
| CWD                               | 2.48±0.18        | 2.49±0.17        | 2.57±0.17        | 2.60±0.18        | 2.61±0.19        |
| Snags                             | 1.22±0.11        | 1.23±0.10        | 1.27±0.10        | 1.30±0.11        | 1.31±0.12        |
| Logs                              | 1.25±0.10        | 1.25±0.10        | 1.30±0.10        | 1.31±0.11        | 1.31±0.11        |
| Litter                            | 3.26±0.17        | 3.23±0.16        | 3.20±0.16        | 3.21±0.16        | 3.19±0.15        |
| <b>Total DOM</b>                  | <b>5.88±0.35</b> | <b>5.85±0.34</b> | <b>5.92±0.33</b> | <b>5.95±0.35</b> | <b>5.95±0.35</b> |
| Stock ( $\text{Tg C}$ )           |                  |                  |                  |                  |                  |
| Woody debris                      | 344±24           | 366±25           | 360±23           | 392±27           | 429±30           |
| FWD                               | 18±1             | 19±1             | 19±1             | 20±2             | 22±2             |
| CWD                               | 326±24           | 347±24           | 341±23           | 371±26           | 407±29           |
| Snags                             | 161±14           | 172±14           | 168±14           | 185±16           | 203±18           |
| Logs                              | 165±13           | 175±14           | 173±14           | 187±15           | 204±16           |
| Litter                            | 430±22           | 452±23           | 424±21           | 458±22           | 496±24           |
| <b>Total DOM</b>                  | <b>774±46</b>    | <b>818±47</b>    | <b>784±44</b>    | <b>850±49</b>    | <b>925±54</b>    |

**Supplementary Table 2** | Coefficient of determination ( $R^2$ ) and root mean square error (RMSE, Mg C ha<sup>-1</sup>) of the Random Forest models.

| Model        | $R^2$ | RMSE |
|--------------|-------|------|
| Woody debris | 0.53  | 1.21 |
| FWD          | 0.36  | 0.08 |
| CWD          | 0.51  | 1.18 |
| Snags        | 0.41  | 0.65 |
| Logs         | 0.46  | 0.74 |
| Litter       | 0.46  | 0.95 |

Notes: Values are the averaged  $R^2$  and RMSE of 500 RF models. FWD and CWD represent fine woody debris and coarse woody debris, respectively.

**Supplementary Table 3** | Carbon concentration (%) for litter and woody debris in different decay classes in six regions of China.

| Region        | Litter   | Decay class for woody debris |          |          |          |
|---------------|----------|------------------------------|----------|----------|----------|
|               |          | 1                            | 2        | 3        | 4        |
| Northeast     | 40.7±7.1 | 49.5±1.2                     | 47.2±1.2 | 49.7±1.7 | 50.8±1.8 |
| North         | 41.9±6.2 | 51.0±4.7                     | 51.4±4.2 | 54.0±3.5 | 54.6±4.2 |
| Northwest     | 41.7±5.1 | 45.7±0.6                     | 45.7±0.5 | 46.1±0.5 | 47.6±1.4 |
| East          | 42.0±7.8 | 43.9±1.3                     | 42.7±3.2 | 44.7±2.2 | 45.9±1.9 |
| South central | 42.3±5.2 | 48.4±2.3                     | 48.4±2.2 | 48.7±2.5 | 49.9±3.5 |
| Southwest     | 41.9±6.6 | 47.3±4.2                     | 48.0±4.1 | 48.1±4.1 | 48.8±3.8 |
| Total         | 41.7±6.6 | 48.1±3.3                     | 47.6±3.3 | 48.5±3.3 | 49.7±3.6 |

**Supplementary Table 4** | Equations for calculating aboveground biomass (AGB, kg) of dominant tree species in different regions used in this study. D and H are diameter at breast height (cm), and height (m) of a tree, respectively.

| Region            | Species                                              | Equation                                                                         | Ref. |
|-------------------|------------------------------------------------------|----------------------------------------------------------------------------------|------|
| Northeast         | <i>Abies fabri</i>                                   | $AGB = \exp(-2.943 + \log D^{2.608})$                                            | 2    |
|                   | <i>Abies nephrolepis</i>                             | $AGB = \exp(-2.943 + 2.608 \ln(D))$                                              | 2    |
|                   | <i>Acer mono</i>                                     | $AGB = 0.3723D^2$                                                                | 3    |
|                   | <i>Betula platyphylla</i>                            | $AGB = 10^{(2.159 + \log D^{2.367})/1000}$                                       | 4    |
|                   | <i>Fraxinus mandschurica</i>                         | $AGB = 0.4803D^2$                                                                | 3    |
|                   | <i>Juglans mandshurica</i>                           | $AGB = 10^{(2.235 + \log D^{2.287})/1000}$                                       | 4    |
|                   | <i>Larix</i>                                         | $AGB = 0.046238(D^2H)^{0.905002}$                                                | 5    |
|                   | <i>Phellodendron amurense</i>                        | $AGB = 10^{(1.942 + \log D^{2.332})/1000}$                                       | 4    |
|                   | <i>Picea asperata</i>                                | $AGB = 0.067732(D^2H)^{0.865949}$                                                | 5    |
|                   | <i>Pinus koraiensis</i>                              | $AGB = 10^{(2.236 + \log D^{2.144})/1000}$                                       | 4    |
|                   | <i>Pinus sylvestris</i>                              | $AGB = 0.2792D^2$                                                                | 3    |
|                   | <i>Populus</i>                                       | $AGB = 0.3521D^2$                                                                | 3    |
|                   | <i>Quercus mongolica</i>                             | $AGB = 10^{(2.002 + \log D^{2.456})/1000}$                                       | 4    |
|                   | <i>Tilia mandshurica</i>                             | $AGB = 0.045H^{1.9768}$                                                          | 6    |
| <i>Ulmus</i>      | $AGB = 0.3593D^2$                                    | 3                                                                                |      |
| Other <i>Acer</i> | $AGB = 0.0786H^{1.8251}$                             | 6                                                                                |      |
| Northwest         | <i>Abies</i>                                         | $AGB = 0.067732(D^2H)^{0.865949}$                                                | 5    |
|                   | <i>Betula</i>                                        | $AGB = 0.14114(D^2H)^{0.7234} + 0.00724(D^2H)^{1.0225} + 0.01513(D^2H)^{0.8085}$ | 7    |
|                   | <i>Larix</i>                                         | $AGB = \exp[0.7681 \ln(D^2H) - 1.9164] \times 4.81/5.81$                         | 8    |
|                   | <i>Picea</i>                                         | $AGB = 0.1244(D^2H)^{0.8052}$                                                    | 9    |
|                   | <i>Pinus</i>                                         | $AGB = \exp[0.9302 \ln(D^2H) - 2.9132] \times 3.14/4.14$                         | 10   |
|                   | <i>Populus</i>                                       | $AGB = \exp[0.9222 \ln(D^2H) - 2.836] \times 2.89/3.89$                          | 10   |
|                   | <i>Quercus liena</i>                                 | $AGB = \exp[0.9979 \ln(D^2H) - 3.5426] \times 3.85/4.85$                         | 10   |
|                   | <i>Quercus mongolica</i> and <i>Q. liaotungensis</i> | $AGB = 0.0369(D^2H)^{0.9165} + 0.00051(D^2H)^{1.3377} + 0.00021(D^2H)^{1.171}$   | 11   |

|                  |                                |                                                                                                             |                                                                                                                       |    |
|------------------|--------------------------------|-------------------------------------------------------------------------------------------------------------|-----------------------------------------------------------------------------------------------------------------------|----|
|                  | <i>Quercus variabilis</i>      | $AGB = \exp[0.8579 \ln(D^2H) - 2.006] \times 3.85 / 4.85$                                                   | 10                                                                                                                    |    |
|                  | Other hardwood                 | $AGB = \exp[0.9037 + \ln(D^2H) - 2.57] \times 3.85 / 4.85$                                                  | 10                                                                                                                    |    |
| North            | <i>Betula</i>                  | $AGB = 0.03190(D^2H)^{0.9356} + 0.00063(D^2H)^{1.2781} + 0.00016(D^2H)^{1.1688}$                            | 11                                                                                                                    |    |
|                  | <i>Fraxinus</i>                | $AGB = 0.6031(D^2H)^{0.8906} + 0.00556(D^2H)^{1.169} + 0.00829(D^2H)^{0.9919}$                              | 12                                                                                                                    |    |
|                  | <i>Juglans</i>                 | $AGB = 0.02511(D^2H)^{0.9271} + 0.00957(D^2H)^{0.974} + 0.08725(D^2H)^{0.2634}$                             | 12                                                                                                                    |    |
|                  | <i>Larix</i>                   | $AGB = 0.046238(D^2H)^{0.905002}$                                                                           | 5                                                                                                                     |    |
|                  | <i>Pinus tabulaeformis</i>     | $AGB = 0.0475(D^2H)^{0.8539} + 0.0017(D^2H)^{1.1515} + 0.0134(D^2H)^{0.8099} + 0.0013(D^2H)^{0.9055}$       | 11                                                                                                                    |    |
|                  | <i>Platycladns</i>             | $AGB = 0.022857(D^2H) + 0.12531(D^2H)^{0.733} + 0.190893$                                                   | 13                                                                                                                    |    |
|                  | <i>Quercus</i>                 | $AGB = 0.0369(D^2H)^{0.9165} + 0.00051(D^2H)^{1.3377} + 0.00021(D^2H)^{1.171}$                              | 11                                                                                                                    |    |
|                  | <i>Ulmus</i>                   | $AGB = 0.05229(D^2H)^{0.891} + 0.01233(D^2H)^{0.9359} + 0.01736(D^2H)^{0.7738}$                             | 12                                                                                                                    |    |
|                  |                                | <i>Castanopsis</i>                                                                                          | $AGB = 0.06491(D^2H)^{0.92}$                                                                                          | 14 |
|                  |                                | <i>Cunninghamia lanceolata</i>                                                                              | $AGB = 0.073429(D^2H)^{0.86262} + 0.013775(D^2H)^{0.84463} + 0.000482(D^2H)^{1.23314} + 0.019638(D^2H)^{0.78969}$     | 5  |
|                  | <i>Cyclobalanopsis</i>         | $AGB = 0.08542(D^2H)^{0.91}$                                                                                | 14                                                                                                                    |    |
|                  | <i>Lithocarpus</i>             | $AGB = 0.04268(D^2H)^{0.98}$                                                                                | 14                                                                                                                    |    |
|                  | <i>Loropetalum</i>             | $AGB = 0.2212D^{2.35119}$                                                                                   | 14                                                                                                                    |    |
| East             | <i>Pinus elliotii</i>          | $AGB = 0.11083(D^2H)^{0.792665}$                                                                            | 15                                                                                                                    |    |
|                  | <i>Pinus massoniana</i>        | $AGB = 0.1377(D^2H)^{0.8172} \times 6.23 / 7.23$                                                            | 16                                                                                                                    |    |
|                  | <i>Quercus</i>                 | $AGB = 0.1199(D^2H)^{0.8509}$                                                                               | 14                                                                                                                    |    |
|                  | <i>Rhododendron</i>            | $AGB = 0.2212D^{1.9932}$                                                                                    | 14                                                                                                                    |    |
|                  | <i>Schima superba</i>          | $AGB = 0.031103(D^2H)^{1.019796}$                                                                           | 15                                                                                                                    |    |
|                  | Other species                  | $AGB = 0.09459(D^2H)^{0.87}$                                                                                | 14                                                                                                                    |    |
|                  |                                | <i>Castanopsis</i>                                                                                          | $AGB = 0.06491(D^2H)^{0.92}$                                                                                          | 14 |
|                  |                                | <i>Cinnamomum</i>                                                                                           | $AGB = 0.055603(D^2H)^{0.850193} + 0.014757(D^2H)^{0.808395} + 0.006652(D^2H)^{1.051841} + 0.059871(D^2H)^{0.574327}$ | 17 |
| South<br>Central | <i>Cunninghamia lanceolata</i> | $AGB = \exp(2.3919 \ln D - 2.52147)$                                                                        | 18                                                                                                                    |    |
|                  | <i>Fagus</i>                   | $AGB = 0.0125(D^2H)^{1.05} + 0.000933(D^2H)^{1.23} + 0.000294(D^2H)^{1.20}$                                 | 19                                                                                                                    |    |
|                  | <i>Pinus massoniana</i>        | $AGB = 10^{[4.44125 \log(D^2H) - 11.6149]}$                                                                 | 20                                                                                                                    |    |
|                  | <i>Populus</i>                 | $AGB = 10^{[1.00110 \log(D^2H) - 1.62289]}$                                                                 | 21                                                                                                                    |    |
|                  | <i>Quercus</i>                 | $AGB = 0.3108(D^2H)^{0.67428} + 0.0293(D^2H)^{0.75662} + 0.0922(D^2H)^{0.39445} + 0.93685(D^2H)^{0.614021}$ | 19                                                                                                                    |    |
|                  | <i>Robinia</i>                 | $AGB = 0.0319(D^2H)^{0.9356} + 0.00063(D^2H)^{1.2781} + 0.00016(D^2H)^{1.1688} + 0.01388(D^2H)^{0.8102}$    | 19                                                                                                                    |    |

|           |                                   |                                                                                                |                            |
|-----------|-----------------------------------|------------------------------------------------------------------------------------------------|----------------------------|
|           | <i>Schima superba</i>             | $AGB=0.07103(D^2H)^{0.91}$                                                                     | 14                         |
|           | Other temperate deciduous species | $AGB=0.082D^{2.38}+2.14D^{1.03}+0.277D^{0.93}$                                                 | 22                         |
|           | Other temperate evergreen species | $AGB=0.00707D^{3.32}+0.762D^{1.15}+0.314D^{1.12}$                                              | 22                         |
|           | Other tropical species            | $AGB=0.040213(D^2H)^{0.97268}$                                                                 | 23                         |
|           | Other species                     | $AGB=0.09459(D^2H)^{0.87}$                                                                     | 14                         |
| Southwest | <i>Abies</i>                      | $AGB=0.0139(D^2H)^{1.0075}+0.0014(D^2H)^{1.0503}+0.0003(D^2H)^{1.2032}$                        | 24                         |
|           | <i>Acer</i>                       | $AGB=0.3274(D^2H)^{0.7218}+0.01349(D^2H)^{0.7198}+0.02347(D^2H)^{0.6929}$                      | 25                         |
|           | <i>Alnus cremastogyne</i>         | $AGB=0.1565(D^2H)^{0.7388}$                                                                    | 26                         |
|           | <i>Betula</i>                     | $AGB=0.14114(D^2H)^{0.7234}+0.00724(D^2H)^{1.0225}+0.01513(D^2H)^{0.8085}$                     | 27                         |
|           | <i>Cupressus funebris</i>         | $AGB=0.2045(D^2H)^{0.7499}$                                                                    | 26                         |
|           | <i>Larix</i>                      | $AGB=0.0204(D^2H)^{0.9719}$                                                                    | 28                         |
|           | <i>Picea</i>                      | $AGB=3.1660(D^2H)^{0.4567}+0.8657(D^2H)^{0.4109}+12.4382(D^2H)^{0.1928}+2.9259(D^2H)^{0.3129}$ | 29                         |
|           | <i>Pinus massoniana</i>           | $AGB=0.0487(D^2H)^{0.9320}$                                                                    | 30                         |
|           | <i>Tsuga</i>                      | $AGB=0.149707(D^2H)^{0.80139}$                                                                 | 5                          |
|           |                                   | Other broadleaf species                                                                        | $AGB=0.0152(D^2H)+10.0895$ |
| Total     | <i>Phyllostachys</i>              | $AGB=0.6439D^{1.5373}$                                                                         | 5                          |
|           | Other <i>Betula</i>               | $AGB=0.0278601(D^2H)^{0.993386}$                                                               | 5                          |
|           | Other <i>Pinus</i>                | $AGB=0.071556(D^2H)^{0.857209}$                                                                | 5                          |
|           | Other softwood                    | $AGB=0.0495502(D^2H)^{0.952453}$                                                               | 5                          |
|           | Other hardwood                    | $AGB=0.044(D^2H)^{0.9169}+0.0023(D^2H)^{0.7115}+0.0104(D^2H)^{0.994}+0.0188(D^2H)^{0.8024}$    | 5                          |

**Supplementary Table 5** | Forest type groups used in forest inventory correspond to the forest types in the digitized 1:1,000,000 vegetation map.

| Major class                         | Forest type group in forest inventory                                                                                                                                                                                                                                                                                                                 | Forest types in vegetation map                                                                                                                                                                                                                                                                                                                                                                                                                                                                                                                                                                                                                                                                                                                                                                                          |
|-------------------------------------|-------------------------------------------------------------------------------------------------------------------------------------------------------------------------------------------------------------------------------------------------------------------------------------------------------------------------------------------------------|-------------------------------------------------------------------------------------------------------------------------------------------------------------------------------------------------------------------------------------------------------------------------------------------------------------------------------------------------------------------------------------------------------------------------------------------------------------------------------------------------------------------------------------------------------------------------------------------------------------------------------------------------------------------------------------------------------------------------------------------------------------------------------------------------------------------------|
| Conifer                             | <i>Abies</i> and <i>Picea</i> forest                                                                                                                                                                                                                                                                                                                  | <i>A. delavayi</i> forest, <i>A. delavayi</i> var. <i>motuoensis</i> forest, <i>A. densa</i> and <i>P. spinulosa</i> mixed forest, <i>A. fabri</i> forest, <i>A. fargesii</i> forest, <i>A. faxoniana</i> forest, <i>A. forrestii</i> forest, <i>A. georgei</i> forest, <i>A. georgei</i> var. <i>smithii</i> forest, <i>A. kawakamii</i> forest, <i>A. nephrolepis</i> forest, <i>A. spectabilis</i> forest, <i>A. squamata</i> forest, <i>P. asperata</i> forest, <i>P. brachytyla</i> forest, <i>P. crassifolia</i> forest, <i>P. jezoensis</i> forest, <i>P. likiangensis</i> forest, <i>P. likiangensis</i> var. <i>balfouriana</i> forest, <i>P. schrenkiana</i> forest, <i>P. likiangensis</i> var. <i>linzhiensis</i> forest, <i>P. meyeri</i> forest, <i>P. purpurea</i> forest, and <i>P. wilsonii</i> forest |
|                                     | Cypress forest                                                                                                                                                                                                                                                                                                                                        | <i>Cupressus funebris</i> forest, <i>Platycladus orientalis</i> forest, <i>Sabina convallium</i> forest, <i>S. przewalskii</i> forest, <i>S. saltuaria</i> forest, <i>S. squamata</i> forest, <i>S. tibetica</i> forest, <i>S. komarovii</i> forest                                                                                                                                                                                                                                                                                                                                                                                                                                                                                                                                                                     |
|                                     |                                                                                                                                                                                                                                                                                                                                                       | <i>Cunninghamia lanceolata</i> forest                                                                                                                                                                                                                                                                                                                                                                                                                                                                                                                                                                                                                                                                                                                                                                                   |
|                                     | <i>Larix</i> forest                                                                                                                                                                                                                                                                                                                                   | <i>L. gmelinii</i> forest, <i>L. kaempferi</i> forest, <i>L. olgensis</i> forest, <i>L. potaninii</i> forest, <i>L. principis-rupprechtii</i> forest, <i>L. chinensis</i> forest, <i>L. potaninii</i> forest, <i>L. sibirica</i> forest                                                                                                                                                                                                                                                                                                                                                                                                                                                                                                                                                                                 |
|                                     |                                                                                                                                                                                                                                                                                                                                                       | <i>Pinus armandii</i> forest                                                                                                                                                                                                                                                                                                                                                                                                                                                                                                                                                                                                                                                                                                                                                                                            |
|                                     |                                                                                                                                                                                                                                                                                                                                                       | <i>Pinus koraiensis</i> forest                                                                                                                                                                                                                                                                                                                                                                                                                                                                                                                                                                                                                                                                                                                                                                                          |
|                                     |                                                                                                                                                                                                                                                                                                                                                       | <i>P. koraiensis</i> , <i>P. koraiensis</i> and <i>Larix sibirica</i> mixed forest                                                                                                                                                                                                                                                                                                                                                                                                                                                                                                                                                                                                                                                                                                                                      |
|                                     |                                                                                                                                                                                                                                                                                                                                                       | <i>Pinus massoniana</i> and <i>P. yunnanensis</i> forest                                                                                                                                                                                                                                                                                                                                                                                                                                                                                                                                                                                                                                                                                                                                                                |
|                                     |                                                                                                                                                                                                                                                                                                                                                       | <i>P. massoniana</i> forest, <i>P. yunnanensis</i> forest, and <i>P. yunnanensis</i> Franch. var. <i>tenuifolia</i> forest                                                                                                                                                                                                                                                                                                                                                                                                                                                                                                                                                                                                                                                                                              |
|                                     |                                                                                                                                                                                                                                                                                                                                                       | <i>Pinus sylvestris</i> var. <i>mongolica</i> forest                                                                                                                                                                                                                                                                                                                                                                                                                                                                                                                                                                                                                                                                                                                                                                    |
|                                     | <i>Pinus tabuliformis</i> forest                                                                                                                                                                                                                                                                                                                      |                                                                                                                                                                                                                                                                                                                                                                                                                                                                                                                                                                                                                                                                                                                                                                                                                         |
|                                     | <i>Tsuga</i> , <i>Cryptomeria</i> , and <i>Keteleeria</i> forest                                                                                                                                                                                                                                                                                      |                                                                                                                                                                                                                                                                                                                                                                                                                                                                                                                                                                                                                                                                                                                                                                                                                         |
|                                     | <i>T. dumosa</i> forest, <i>T. formosana</i> or <i>Picea morrisonicola</i> forest                                                                                                                                                                                                                                                                     |                                                                                                                                                                                                                                                                                                                                                                                                                                                                                                                                                                                                                                                                                                                                                                                                                         |
|                                     | Other pines and conifer forests                                                                                                                                                                                                                                                                                                                       |                                                                                                                                                                                                                                                                                                                                                                                                                                                                                                                                                                                                                                                                                                                                                                                                                         |
|                                     | <i>Juniperus rigida</i> forest, <i>Pinus densata</i> forest, <i>P. fenzeliana</i> forest, <i>P. griffithii</i> forest, <i>P. palustris</i> forest, <i>P. pumila</i> forest, <i>P. thunbergii</i> forest, <i>P. bungeana</i> forest, <i>P. densiflora</i> forest, <i>P. henryi</i> forest, <i>P. kesiya</i> forest, and <i>P. morrisonicola</i> forest |                                                                                                                                                                                                                                                                                                                                                                                                                                                                                                                                                                                                                                                                                                                                                                                                                         |
| Broadleaf and conifer mixed forests | Mixed conifer and deciduous forest                                                                                                                                                                                                                                                                                                                    | <i>Chamaecyparis formosensis</i> , <i>C. obtusa</i> , <i>Fagus longipetiolata</i> and <i>Trochodendron aralioides</i> mixed forest, <i>P. koraiensis</i> and deciduous broadleaf mixed forest, <i>Tsuga chinensis</i> -broadleaf mixed forest, and <i>Tsuga dumosa</i> -broadleaf mixed forest                                                                                                                                                                                                                                                                                                                                                                                                                                                                                                                          |
|                                     | <i>Betula</i> forest                                                                                                                                                                                                                                                                                                                                  | <i>B. platyphylla</i> forest, <i>B. albosinensis</i> var. <i>septen-trionalis</i> forest, <i>B. albosinensis</i> forest, <i>B. ermanii</i> elfin forest, <i>B. luminifera</i> and <i>Populus adenopoda</i> forest, <i>B. utilis</i> forest                                                                                                                                                                                                                                                                                                                                                                                                                                                                                                                                                                              |
| Deciduous broadleaf forests         | Deciduous oak forest                                                                                                                                                                                                                                                                                                                                  | <i>Quercus mongolica</i> forest, <i>Q. wutaishanica</i> forest, <i>Q. aliena</i> forest, <i>Q. dentata</i> forest, <i>Q. acutissima</i> forest, <i>Q. aliena</i> var. <i>acuteserrata</i> forest, <i>Q. variabilis</i> forest, <i>Q. baronii</i> forest, <i>Q. fabri</i> and <i>Q. serrata</i> Thunb. var. <i>brevipetiolata</i> mixed forest, <i>Q. serrata</i> forest, <i>Q. variabilis</i> and <i>Q. acutissima</i> mixed forest                                                                                                                                                                                                                                                                                                                                                                                     |
|                                     | Nonmerchantable forest                                                                                                                                                                                                                                                                                                                                | <i>Tilia</i> and <i>Aceraceae</i> mixed forest                                                                                                                                                                                                                                                                                                                                                                                                                                                                                                                                                                                                                                                                                                                                                                          |



|                             |                                                                                                                                                                                                                                                                                                                                                                                                                                                                                                                                                                                                                                                                                                                                                                                                                                                                                                                                                                                                                                                                                                                                                                                                                                                                                                                                                                                                                                                                                                                                                                                                                                                                                                                                                                                                                                                                                                                     |
|-----------------------------|---------------------------------------------------------------------------------------------------------------------------------------------------------------------------------------------------------------------------------------------------------------------------------------------------------------------------------------------------------------------------------------------------------------------------------------------------------------------------------------------------------------------------------------------------------------------------------------------------------------------------------------------------------------------------------------------------------------------------------------------------------------------------------------------------------------------------------------------------------------------------------------------------------------------------------------------------------------------------------------------------------------------------------------------------------------------------------------------------------------------------------------------------------------------------------------------------------------------------------------------------------------------------------------------------------------------------------------------------------------------------------------------------------------------------------------------------------------------------------------------------------------------------------------------------------------------------------------------------------------------------------------------------------------------------------------------------------------------------------------------------------------------------------------------------------------------------------------------------------------------------------------------------------------------|
| Populus forest              | <p><i>P. simonii</i> forest, <i>P. nigra</i> forest, <i>Populus</i>, <i>Salix</i> and <i>Ulmus</i> mixed forest, <i>P. davidiana</i> forest, <i>P. tremula</i> forest, <i>P. przewalskii</i> forest, <i>Chosenia arbutifolia</i> and <i>P. suaveolens</i> forest, <i>P. euphratica</i> open forest, <i>P. pruinosa</i> open forest, <i>P. davidiana</i> and <i>B. platyphylla</i> forest</p>                                                                                                                                                                                                                                                                                                                                                                                                                                                                                                                                                                                                                                                                                                                                                                                                                                                                                                                                                                                                                                                                                                                                                                                                                                                                                                                                                                                                                                                                                                                        |
| Other broadleaf forests     | <p><i>Ulmus davidiana</i>, <i>Fraxinus mandschurica</i> and <i>Juglans mandshurica</i> mixed forest, <i>Robinia pseudoacacia</i> forest, <i>Malus sieversii</i> forest, <i>Salix matsudana</i> forest, <i>U. pumila</i> open forest, <i>Toxicodendron</i> spp. and <i>Acer mono</i> mixed forest, <i>Pteroceltis tatarinowii</i> forest, <i>Castanea seguinii</i>, <i>Quercus serrata</i> Thunb. var. <i>brevipetiolata</i> and <i>Platycarya strobilacea</i> mixed forest, <i>Liquidambar formosana</i> forest, <i>Platycarya strobilacea</i> and <i>Dalbergia hupeana</i> forest, <i>Alnus nepalensis</i> forest, <i>Q. variabilis</i> and evergreen broadleaf mixed forest, <i>Q. acutissima</i> and <i>Q. engleriana</i> mixed forest, <i>Q. acutissima</i>, <i>Q. variabilis</i>, <i>Phoebe zhennan</i> and <i>Cyclobalanopsis glauca</i> mixed forest, <i>C. multinervis</i> and <i>Fagus longipetiolata</i> mixed forest, <i>Lithocarpus cleistocarpus</i>, <i>Davidia involucrata</i> and <i>Tetracentron sinense</i> mixed forest, <i>C. glauca</i> and deciduous broadleaf mixed forest, <i>C. glaucoides</i> and <i>Platycarya longipes</i> mixed forest</p>                                                                                                                                                                                                                                                                                                                                                                                                                                                                                                                                                                                                                                                                                                                                             |
| Other broadleaf forests     | <p><i>Altingia chinensis</i> and <i>Rhodoleia championii</i> mixed forest, <i>Castanopsis delavayi</i>, <i>Cyclobalanopsis delavayi</i> and <i>Cyclobalanopsis glaucoides</i> mixed forest, <i>Castanopsis eyrei</i> and <i>C. carlesii</i> mixed forest, <i>Castanopsis fabri</i> and <i>C. calathiformis</i> mixed forest, <i>C. fargesii</i> forest, <i>C. fleuryi</i> and <i>Lithocarpus truncatus</i> mixed forest, <i>C. indica</i>, <i>C. platyacantha</i> and <i>Schima wallichii</i> mixed forest, <i>C. kawakamii</i> and <i>C. fleuryi</i> mixed forest, <i>C. orthacantha</i> forest, <i>C. platyacantha</i> and <i>C. tonkinensis</i> mixed forest, <i>C. platyacantha</i> forest, <i>C. sclerophylla</i> and <i>Cyclobalanopsis glauca</i> mixed forest, <i>Cryptocarya</i> spp. and <i>Castanopsis</i> spp. mixed forest, <i>Cyclobalanopsis glauca</i> and <i>Trochodendron aralioides</i> mixed forest, <i>Cyclobalanopsis oxyodon</i> and <i>C. gracilis</i> mixed forest, <i>Fagus longipetiolata</i>, <i>Lithocarpus glaber</i> and <i>Trochodendron aralioides</i> mixed forest, <i>Ficus</i> spp. and <i>Machilus kusanoi</i> mixed forest, <i>Lithocarpus cleistocarpus</i> forest, <i>Lithocarpus megalophyllus</i>, <i>Castanopsis carlesii</i> and <i>Beilschmiedia intermedia</i> mixed forest, <i>Lithocarpus variolosus</i> and <i>Schima argentea</i> mixed forest, <i>Lithocarpus xylocarpus</i>, <i>L. hancei</i>, <i>Cyclobalanopsis lamellosa</i> and <i>L. megalophyllus</i> mixed forest, <i>Machilus thunbergii</i> forest, <i>Quercus aquifolioides</i> forest, <i>Q. cocciferoides</i> forest, <i>Q. guyavaefolia</i> and <i>Q. longispica</i> mixed forest, <i>Q. pannosa</i> forest, <i>Q. pseudosemecarpifolia</i> and <i>Q. senescens</i> mixed forest, <i>Q. semicarpifolia</i> forest, and <i>Rhodoleia championii</i> and <i>Manglietia fordiana</i> mixed forest</p> |
| Evergreen broadleaf forests | <p><i>Bombax malabaricum</i> and <i>Albizia chinensis</i> mixed forest, <i>Dacrydium pierrei</i>, <i>Lithocarpus thalassica</i> and <i>Madhuca hainanensis</i> mixed forest, <i>Dipterocarpus retusus</i> and <i>Crypteronia paniculata</i> mixed forest, <i>Dipterocarpus turbinatus</i>, <i>Pandanus tectorius</i> and <i>Dysoxylum binectariferum</i> mixed forest, <i>Dysoxylum excelsum</i>, <i>Terminalia myriocarpa</i> and <i>Altingia excelsa</i> mixed forest, <i>Eberhardia tonkinensis</i>, <i>Madhuca pasquieri</i> and <i>Altingia chinensis</i> mixed forest, <i>Excentrodendron hsienmu</i>, <i>Garcinia paucinervis</i> and <i>Cephalomappa sinensis</i> mixed forest, <i>Ficus altissima</i> and <i>Chukrasia tabularis</i> mixed forest, <i>F. benjamina</i>, <i>Barringtonia asiatica</i> and <i>Heritiera littoralis</i> mixed forest, <i>F. benjamina</i>, <i>Bischofia polycarpa</i> and <i>Dysoxylum excelsum</i> mixed forest, <i>F. microcarpa</i>, <i>Sterculia lanceolata</i> and <i>Schefflera octophylla</i> mixed forest, <i>Lysidice rhodostegia</i> and <i>Amesiodendron tienlinense</i> mixed forest, <i>Madhuca pasquieri</i> and <i>Altingia yunnanensis</i> mixed forest, <i>Parashorea chinensis</i> forest, <i>Podocarpus imbricatus</i>, <i>Hopea hainanensis</i> and <i>Adinandra hainanensis</i> mixed forest, <i>Schima wallichii</i> and <i>Liquidambar formosana</i> mixed forest, <i>Schoepfia jasminodora</i> forest, <i>Semecarpus reticulata</i> and <i>Phoebe nanmu</i> mixed forest, <i>T. hainanensis</i> and <i>Lannea coromandelica</i> mixed forest, <i>T. myriocarpa</i> and <i>Pometia pinnata</i> mixed forest</p>                                                                                                                                                                                                                                        |

## Supplementary References

1. Editorial Board of Vegetation Map of China. Vegetation Atlas of China. Science Press, Beijing (2001) [in Chinese].
2. Wang, J. S. *et al.* Biomass structure and allometry of *Abies nephrolepis* (Maxim) in Northeast China. *Silva Fenn.* **45**, 211–226 (2011).
3. Yang, J. M. & Fang, W. Y. Theoretical model for biomass of main tree species in Xiaoxing'an mountains. *J. Northwest For. Univ.* **39**, 46–48 (2011) [In Chinese with English abstract].
4. Wang, C. Biomass allometric equations for 10 co-occurring tree species in Chinese temperate forests. *For. Ecol. Manage.* **222**, 9–16 (2006).
5. Li, H. K. & Lei, L. C. Estimation and evaluation of forest biomass carbon storage in China. China Forestry Publishing Press, Beijing (2010) [In Chinese].
6. Han, S. Field observation and research database of ecosystems in China. Forest Ecosystem Volume, Changbaishan site (2001-2008). Science Press, Beijing (2012) [In Chinese].
7. Jiang, H. Plant ecology research. Insititute of Botany, The Chinese Academy of Sciences, Beijing (1992) [In Chinese].
8. Shen, Y. Z. *et al.* Study on the individual tree biomass of *Larix kaempferi* plantation in Xiaolong mountain, Gansu provinve. *For. Res.* **24**, 517–522 (2011) [In Chinese with English abstract].
9. Zhang, H. F. *et al.* A comparative study on biomass models for *Picea schrenkiana* in Xinjiang. *J. Northwest For. Univ.* **30**, 52–58 (2015) [In Chinese with English abstract].
10. Chen, T. R., Ma, Q. Y., Feng, Z. K. & Luo, X. Research on forest biomass in Xiaolong Mountains, Gansu Province. *J. Beijing For. Univ.* **29**, 31–36. (2007) [In Chinese with English abstract].

11. Fang, J. Y., Guo, Z. D., Piao, S. L. & Chen, A. P. Terrestrial vegetation carbon sinks in China, 1981–2000. *Sci. China Earth Sci.* **50**, 1341–1350 (2007).
12. Sang, W., Su, H. & Bai, F. Field observation and research database of ecosystems in China. Forest Ecosystem Volume, Beijing site (2000-2006). China Agriculture Press. (2010) [In Chinese].
13. Chen, L. Z. *et al.* Studies on Chinese arborvitae (*Platycladus orientalis*) forest and its biomass in Beijing. *Acta Phytoecol. Sin.* **10**, 17–24. (1986) [In Chinese with English abstract].
14. Lin, D., Lai, J., Muller-Landau, H. C., Mi, X. & Ma K. Topographic variation in aboveground biomass in a subtropical evergreen broad-leaved forest in China. *PLoS ONE* **7**, e48244 (2012).
15. Yang, H. *et al.* A study on the biomass and growth of three forestation models in Jishui region. *Acta Agr. Univ. Jiangxiensis* **26**, 164–168 (2004) [In Chinese with English abstract].
16. Wu, S. R., Yang, H. Q., Hong, R., Zhu, W. & Chen, X. Q. Studies on the biomass of *Pinus massoniana* plantations and its structure. *J. Fujian For. Sci. Technol.* **26**, 18–21 (1999) [In Chinese with English abstract].
17. Yao, Y. J., Kang, W. X. & Tian, D. L. Study of the biomass and productivity of *Cinnamomum camphora* plantation. *J. Cent. South For. Univ.* **23**, 1–5 (2003) [In Chinese with English abstract].
18. Wen, G. Y. Establishment and application of stand biomass scale of *Cunninghamia*. *Cent. South For. Inventory Plan.* **1**, 42–45 (1993) [In Chinese].
19. Fu, M. Y., He, J. Z., Song, L. H., Guo, H. H. & Yang, H. Z. The dynamic tree layer biomass of forest vegetation in the mountainous areas of Sanmenxia. *Henan Sci.* **34**, 332–337 (2016) [In Chinese with English abstract].

20. Feng, Z. W. *et al.* Determination of biomass of *Pinus massoniana* stand in Huitong county, Hunan province. *Sci. Silvae Sin.* **18**, 127–134 (1982) [In Chinese with English abstract].
21. Zhao, T. S. Study on material cycling in agroforestry complex ecosystem. I. Study on biomass of poplar in farm- and wood- land. *Rural Ecol. Environ.* **2**, 1–5 (1989) [In Chinese].
22. Wang, X. Y., Hu, D. & He, J. S. Biomass research of *Fagus engleriana* and *Quercus aliena* var. *acuteserrata* forest in Shennongjia forest district. *J. Cap. Normal Univ.* **28**, 62–67 (2007) [In Chinese with English abstract].
23. Li, Y. D. Comparative analysis for biomass measurement of tropical mountain rain forest in Hainan island, China. *Acta Ecol. Sin.* **13**, 314–320 (1993).
24. Luo, T. X. *et al.* Distribution patterns of aboveground biomass in Tibetan alpine vegetation transects. *Acta Phytoecol. Sin.* **26**, 668–676 (2002) [In Chinese with English abstract].
25. Chen, C. G. Biomass regression equations for broadleaf korean pine mixed forests. *Yanbian For. Sci. Technol.* **1**, 2–19 (1983) [In Chinese with with English abstract].
26. Shi, P. L., Yang, X. & Zhong, Z. C. Dynamics of population biomass and its density-dependent regulation in alder and cypress mixed forest. *Chinese J. Appl. Ecol.* **8**, 341–346 (1997) [In Chinese with English abstract].
27. Feng, Z. W., Wang, X. K. & Wu, G. Biomass and net productivity of the Chinese forest ecosystem. Science Press, Beijing (1999) [In Chinese].
28. Su, Y. M. A study on biomass and production of *Larix kaempfer* plantation. *J. Sichuan For. Sci. Technol.* **16**, 36–42 (1995) [In Chinese].
29. Jiang, H. Biomass and primary production in natural *Picea purpurea* forests. *Acta Phytoecol. Sin.* **10**, 146–152 (1986) [In Chinese with English abstract].

30. Zhang, Z. J. *et al.* Study on the biomass structure and distribution of natural secondary forest of *Pinus massoniana*. *J. Agr. Univ. Hebei* **29**, 37–43 (2006) [In Chinese with English abstract].
